# Supplementary material for: MiR-146a Contributes to Thromboinflammation and Recurrence in Young Patients with Acute Myocardial Infarction
Source: MDPI journal article supplement (doi:10.3390/jpm12071185), 2022-07-20
Supplement: s1 [file s1]

Figure S1.

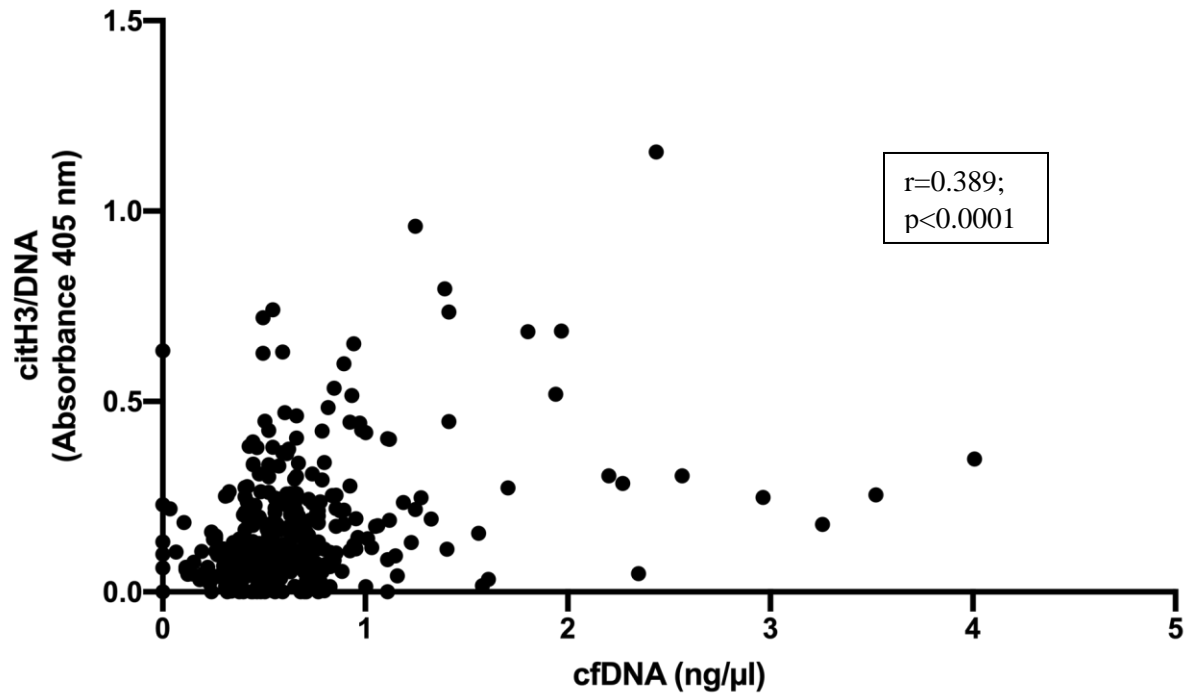

**Figure S1. Correlation between citH3-DNA and cfDNA.** Levels of citH3-DNA and cfDNA were measured in plasma from all ACS patients and Pearson's correlation analysis was performed using SPSS software.

**Figure S2.**

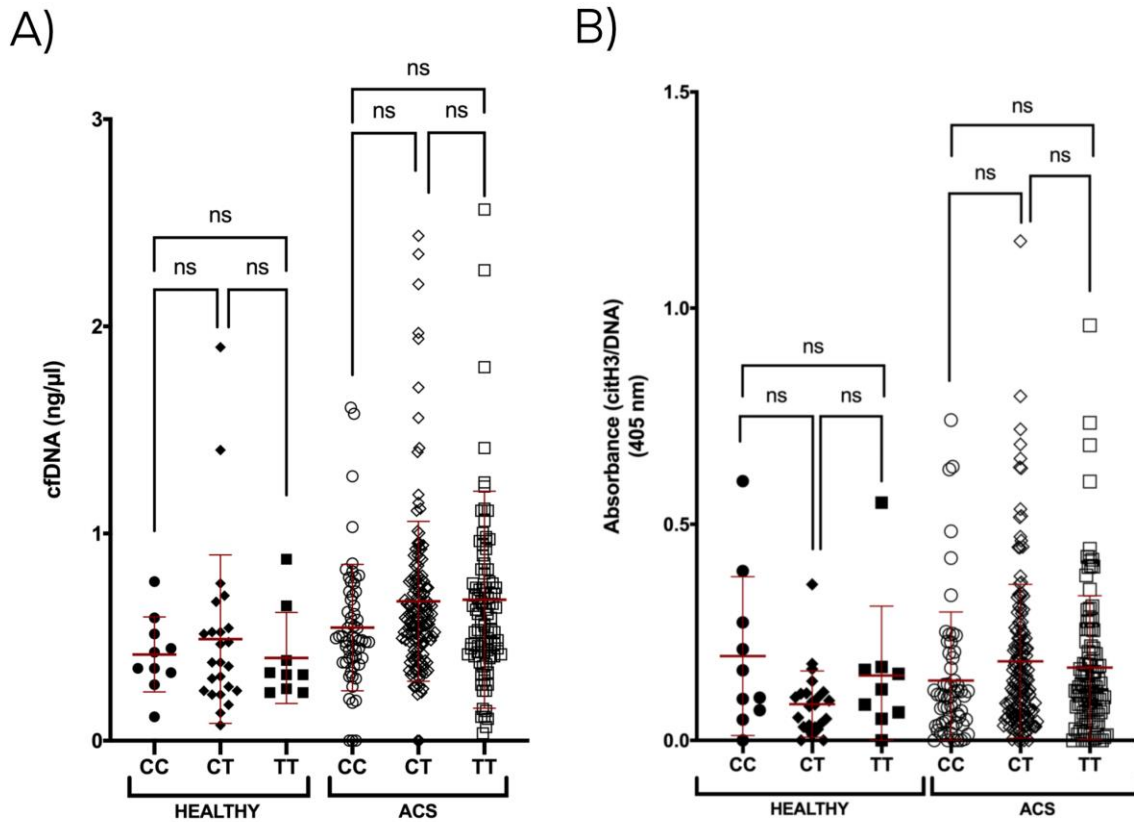

**Figure S2. Levels of NETosis markers in ACS young patients.** A) cfDNA levels in healthy donors (n=55) vs ACS patients (n=342) measured by Sytox Green fluorescence. B) citH3-DNA complexes in healthy individuals (n=51) vs ACS patients (n=343) measured by ELISA and expressed as relative absorbance at 405 nm.

Figure S3.

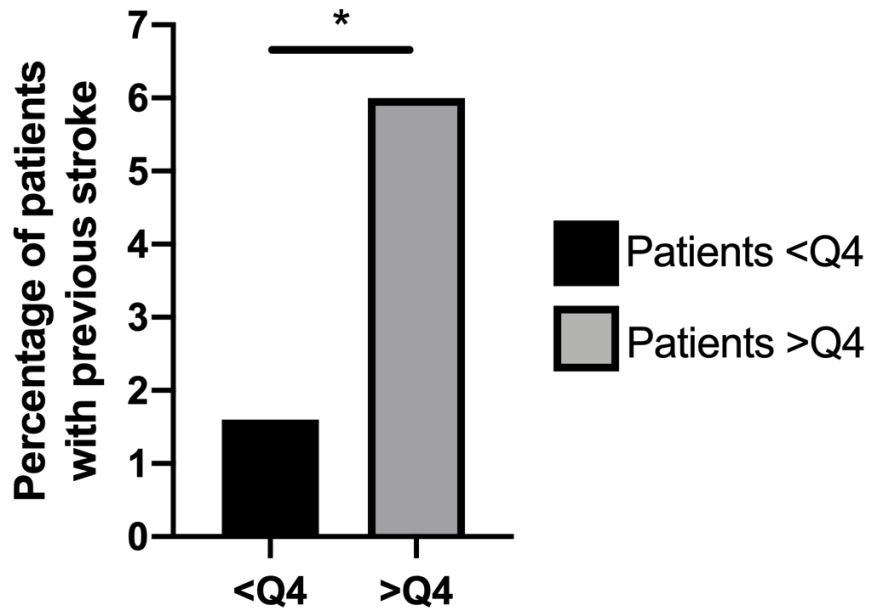

**Figure S3. Percentage of patients with previous stroke in relation with citH3-DNA levels.** ACS patients with previous stroke with levels of citH3-DNA below Q4 quartile were compared with those above Q4. \* $p < 0.05$ .
